# Supplementary material for: Features of an altered AMPK metabolic pathway in Gilbert’s Syndrome, and its role in metabolic health
Source: PubMed Central journal article supplement (PMC4956769; doi:10.1038/srep30051), 2016-07-21
Supplement: srep30051-s1.pdf [file srep30051-s1.pdf]

**"Features of an altered AMPK metabolic pathway in Gilbert's Syndrome, and its role in energy turnover and metabolic health."**

Christine Mölzer, Marlies Wallner, Carina Kern, Anela Tosevska, Ursula Schwarz, Rene Zadnikar, Daniel Doberer, Rodrig Marculescu, Karl-Heinz Wagner

**SUPPLEMENTARY FIGURES:**

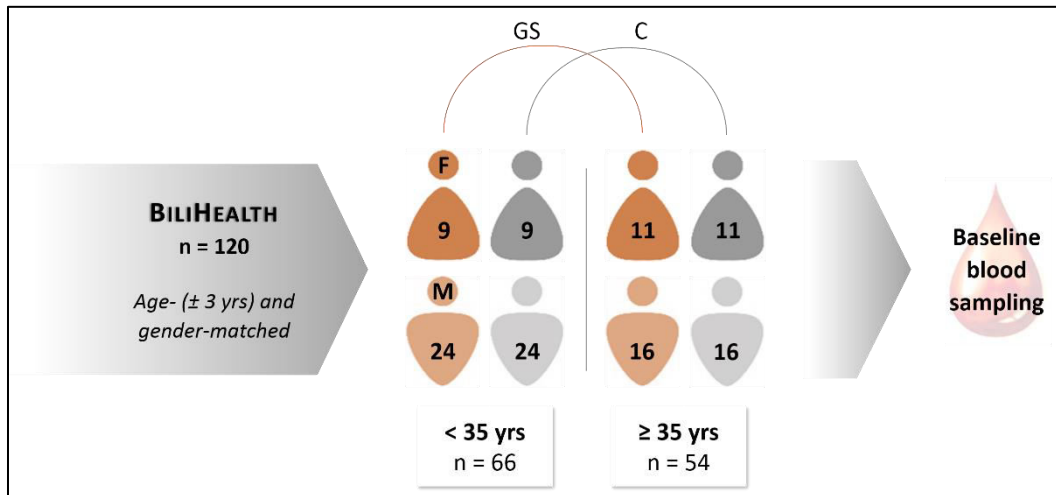

**Supplementary figure S1. BiliHealth study design.** A total of 80 males and 40 females (n = 120) completed the study. Subjects were age- and gender-matched. Study group allocation (Gilbert's Syndrome, GS; controls, C) was based on the subjects' respective serum UCB concentrations (unconjugated bilirubin  $\leq/\geq 17.1 \mu\text{M}$ ). Participants were furthermore allocated to age groups ( $</\geq 35$  years of age). All subjects underwent a baseline blood sampling.

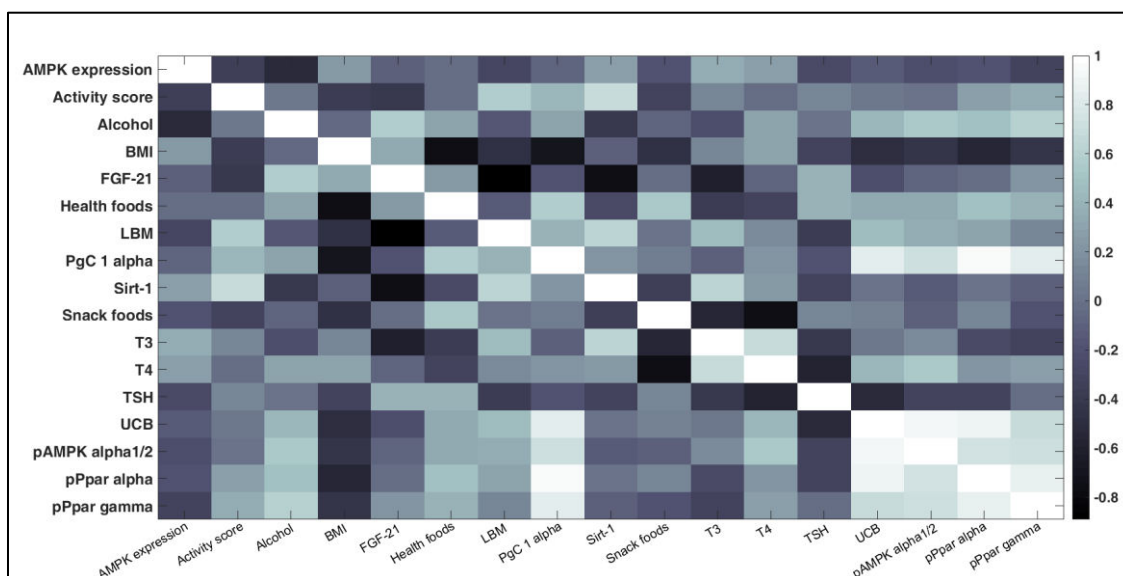

**Supplementary figure S2 a. Heat map showing inter-variable connection for markers of energy-metabolism.**

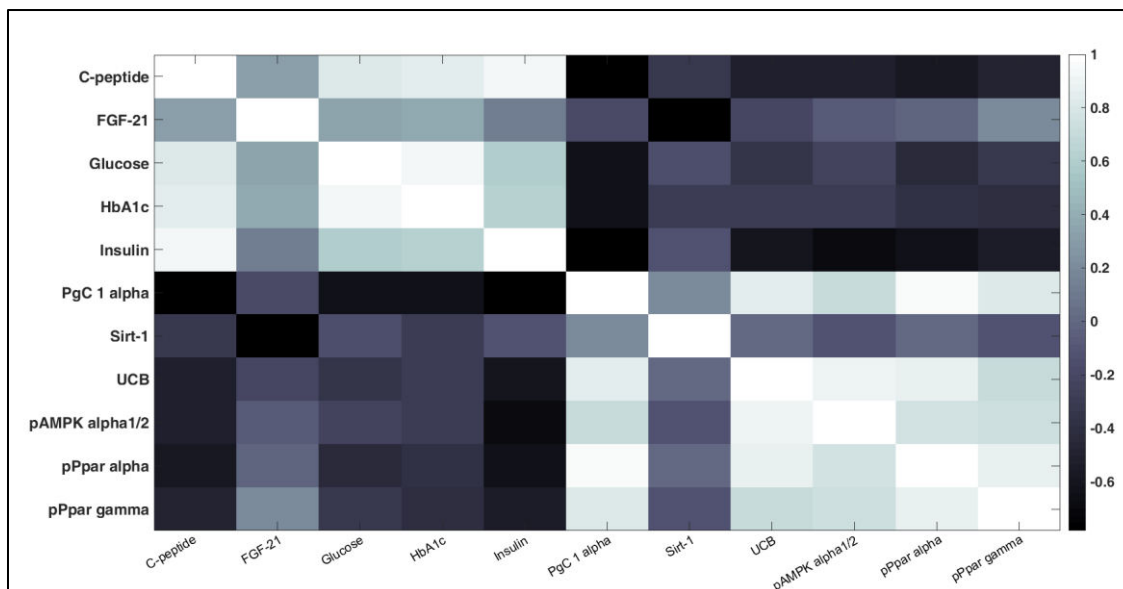

**Supplementary figure S2 b.** Heat map showing inter-variable connection for markers of glucose-metabolism.

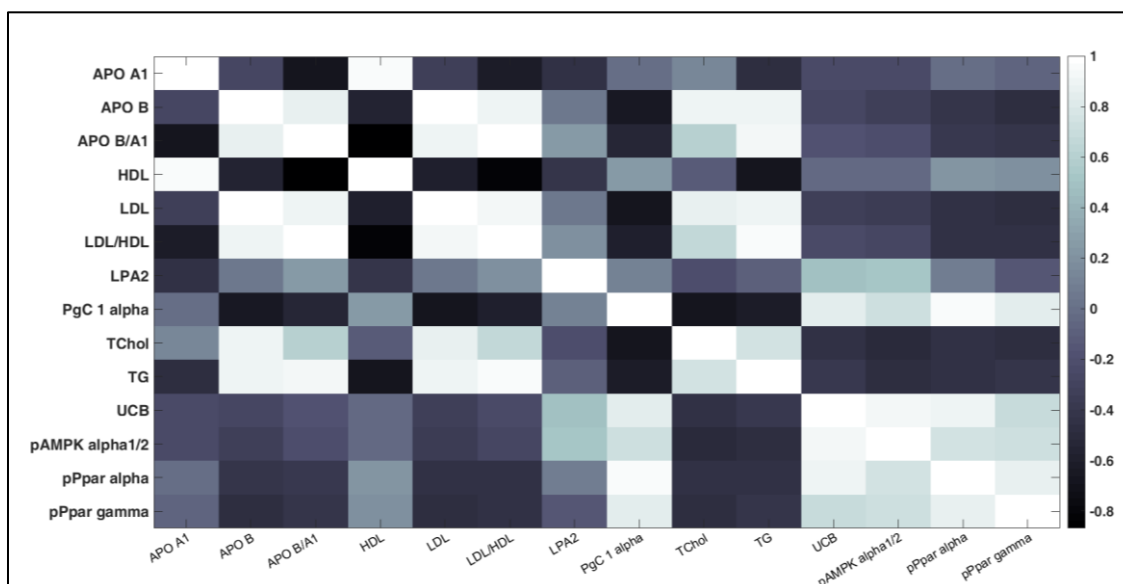

**Supplementary figure S2 c.** Heat map showing inter-variable connection for markers of lipid-metabolism.

**Supplementary figures S2 a – c.** Heat maps showing inter-variable connection with respect to energy- (a), glucose- (b) and lipid metabolism (c). Heat maps were generated using the COVAIN toolbox for MATLAB [MATLAB and Statistics Toolbox Release 2015a, The MathWorks, Inc., Natick, Massachusetts, United States.], and including the entire dataset (all subjects).

**Abbreviations:** UCB: unconjugated bilirubin; UGT1A1: UGT1A1 genotype; pAMPK  $\alpha$ 1/ $\alpha$ 2: Phosphorylated 5'-AMP activated kinase; pPpar  $\alpha$ : Phosphorylated peroxisome proliferator activated receptor alpha; pPpar  $\gamma$ : Phosphorylated peroxisome proliferator activated receptor gamma; PgC 1 $\alpha$ : Peroxisome proliferator-activated receptor c coactivator 1; AMPK1a expr.: AMPK gene expression as relative quantification, RQ to cDNA pool; Sirt-1: Sirtuin-1; FGF-21: Fibroblast growth factor 21; TSH: Thyroid stimulating hormone; T3: Free triiodothyronine; T4: Free thyroxine; BMI: Body mass index; LBM: Lean body mass; HbA1c: Glycated haemoglobin A1c; TChol: Total cholesterol; HDL: High density lipoprotein cholesterol; LDL: Low density lipoprotein cholesterol; TG: Triglyceride; LPA2: Lipoprotein A2; ApoA1: Apolipoprotein A1; ApoB: Apolipoprotein B; Activity score: self-reported daily activity (walking, climbing stairs, physical exercise); Alcohol/Health foods/Snack foods: self-reported weekly consumption.
